# Supplementary material for: Expression of long non-coding RNA MFI2-AS1 is a strong predictor of recurrence in sporadic localized clear-cell renal cell carcinoma
Source: PubMed Central journal article supplement (PMC5561098; doi:10.1038/s41598-017-08363-6), 2017-08-17

**Expression of long non-coding RNA *MF12-AS1* is a strong predictor of recurrence in sporadic localized clear-cell renal cell carcinoma**

Ronan Flippot, Roger Mouawad, Jean-Philippe Spano, Morgan Rouprêt, Eva Compérat, Marc-Olivier Bitker, Jérôme Parra, Christophe Vaessen, Frederick Allanic, Quentin Manach, Nizar M. Tannir, David Khayat, Xiaoping Su & Gabriel G. Malouf

**Supplementary Tables.**

**Supplementary Table 1.** Intratumor heterogeneity of *MF12-AS1* expression in the validation cohort.

| <b>Sample name</b> | <b>Region of the primary tumor</b> | <b><i>MF12-AS1</i> expression</b> | <b>Normalized quantitation of <i>MF12-AS1</i> expression</b> |
|--------------------|------------------------------------|-----------------------------------|--------------------------------------------------------------|
| <b>HET11</b>       | <b>1</b>                           | <b>Yes</b>                        | <b>0,51</b>                                                  |
|                    | <b>2</b>                           | <b>Yes</b>                        | <b>12,73</b>                                                 |
|                    | <b>3</b>                           | <b>Yes</b>                        | <b>10,56</b>                                                 |
| <b>HET1</b>        | <b>1</b>                           | <b>Yes</b>                        | <b>3,58</b>                                                  |
|                    | <b>2</b>                           | <b>Yes</b>                        | <b>6,32</b>                                                  |
| <b>HET16</b>       | <b>1</b>                           | <b>Yes</b>                        | <b>9,92</b>                                                  |
|                    | <b>2</b>                           | <b>Yes</b>                        | <b>6,15</b>                                                  |
| <b>HET2</b>        | <b>1</b>                           | <b>Yes</b>                        | <b>8,22</b>                                                  |
|                    | <b>2</b>                           | <b>Yes</b>                        | <b>0,88</b>                                                  |
|                    | <b>3</b>                           | <b>Yes</b>                        | <b>80,45</b>                                                 |
|                    | <b>4</b>                           | <b>Yes</b>                        | <b>1,10</b>                                                  |
| <b>HET17</b>       | <b>1</b>                           | <b>Yes</b>                        | <b>1,32</b>                                                  |
|                    | <b>2</b>                           | <b>Yes</b>                        | <b>7,94</b>                                                  |
|                    | <b>3</b>                           | <b>No</b>                         | <b>0,00</b>                                                  |
| <b>HET5T</b>       | <b>1</b>                           | <b>Yes</b>                        | <b>0,13</b>                                                  |
|                    | <b>2</b>                           | <b>Yes</b>                        | <b>0,60</b>                                                  |
|                    | <b>3</b>                           | <b>Yes</b>                        | <b>0,93</b>                                                  |

**Supplementary Table 2.** Hazard ratios for disease-free survival according to Leibovich (< 5 or ≥ 5) and *MF12-AS1* (expression or no expression) stratification. NS: not significant

| <b>Group comparison</b> | <b>Hazard Ratio [95% confidence interval]</b> | <b>p-value</b> |
|-------------------------|-----------------------------------------------|----------------|
| L+M+ vs. L+M-           | 12,16 [3,76 - 39,34]                          | <0.0001        |
| L+M+ vs. L-M+           | 10,82 [2,61 - 44,85]                          | <0.0001        |
| L+M+ vs. L-M-           | 15,28 [2,61 - 89,57]                          | <0.0001        |
| L+M- vs. L-M+           | 0,56 [0,15 - 2,15]                            | NS             |
| L+M- vs. L-M-           | 0,99 [0,22 - 4,40]                            | NS             |
| L-M+ vs. L-M-           | 1,70 [0,64 - 4,49]                            | NS             |

## Supplementary Figures

### Supplementary Figures Legends

**Supplementary Figure 1.** Example of qPCR curves for *MF12-AS1* assessment in the validation cohort. A) No detectable *MF12-AS1* expression B) Detectable *MF12-AS1* expression

**Supplementary Figure 2.** ROC curves for recurrence prediction according to Leibovich classification and *MF12-AS1* status in the validation cohort. A) Combined Leibovich (<5/≥ 5) and *MF12-AS1* (expression/no expression) classification. B) Leibovich classification (<5/≥5) alone. C) *MF12-AS1* (expression vs. no expression). D) *MF12-AS1* (continuous).

**Supplementary Figure 3.** Disease-free survival according to *MF12-AS1* and distinct Leibovich classification cutoffs in the validation cohort. A) *MF12-AS1* and Leibovich low, intermediate or high B) *MF12-AS1* and Leibovich low or intermediate + high

Supplementary Figure 1.

A.

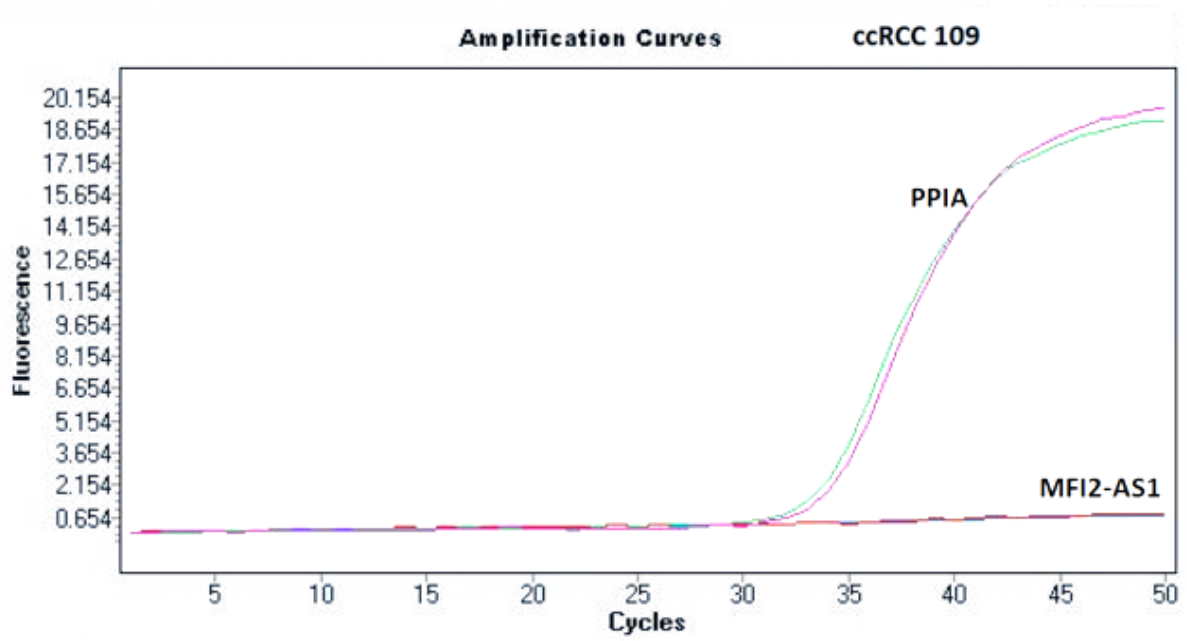

B.

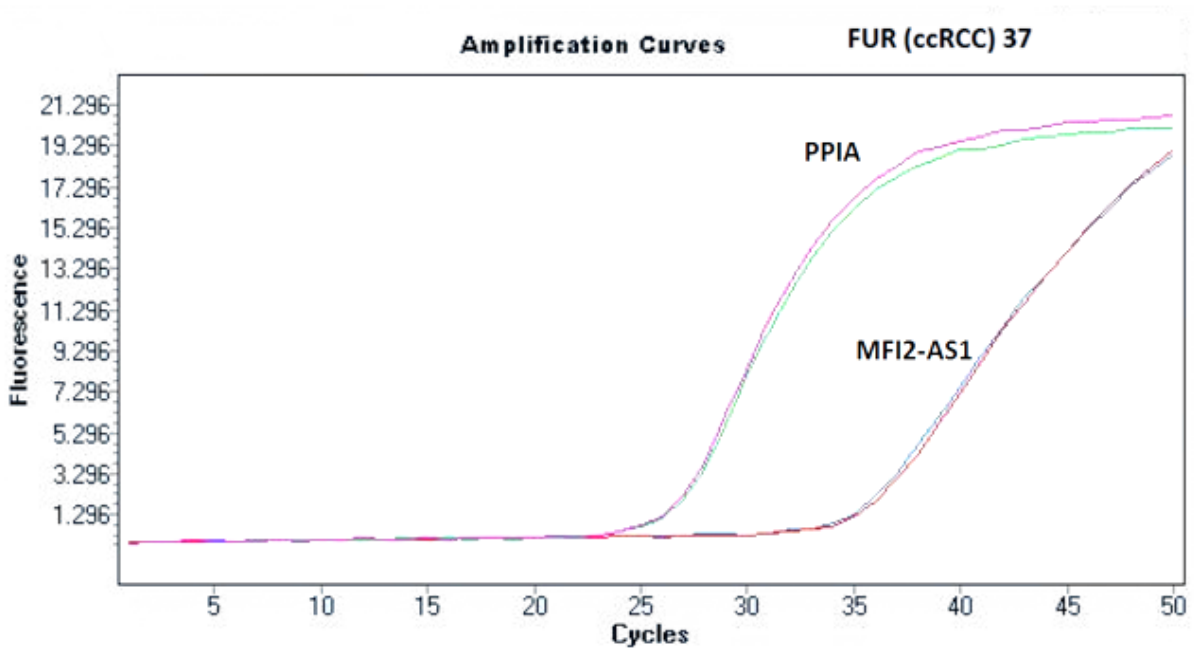

**Supplementary Figure 2.**

**A.**

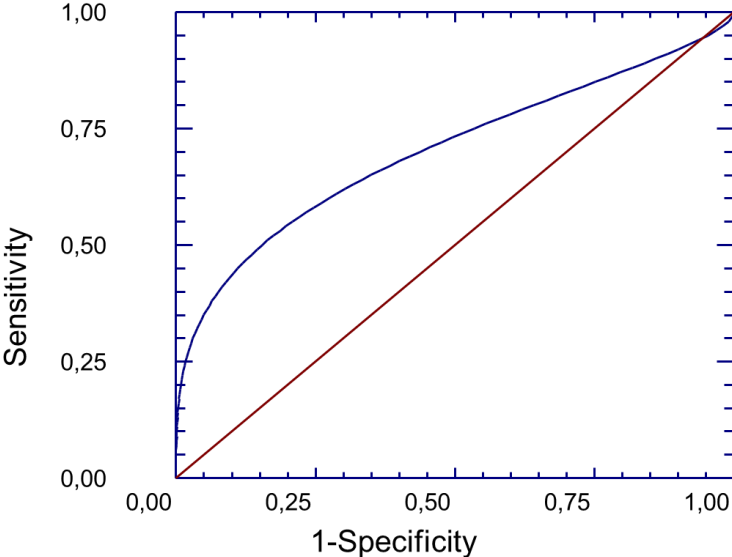

Binormal estimate of AUC 0,701960

**B.**

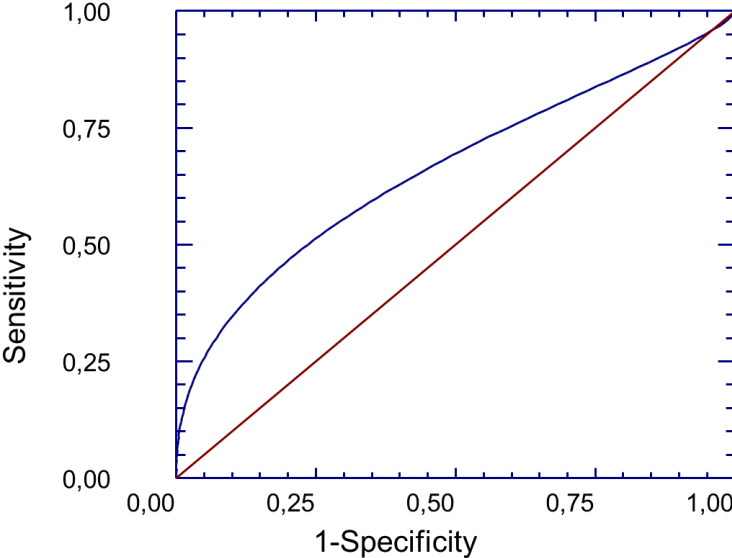

Binormal estimate of AUC 0,66100

**C.**

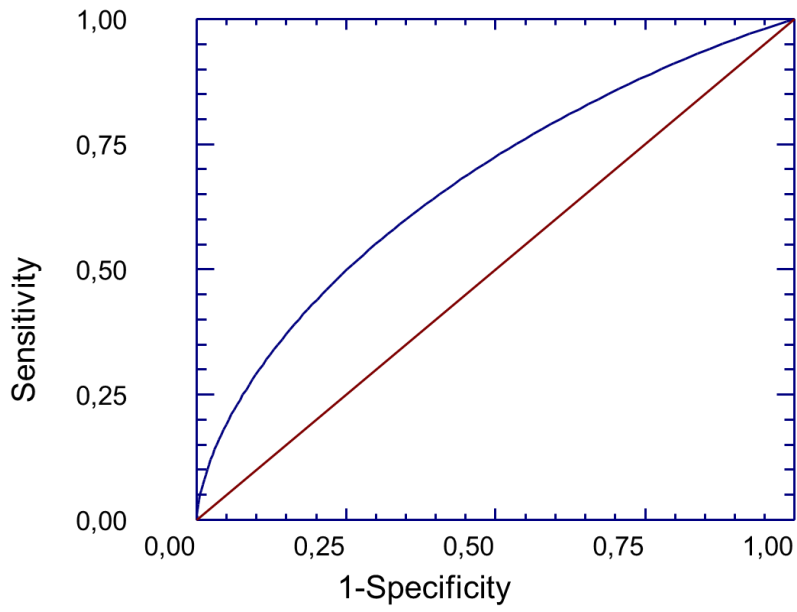

Binormal estimate of AUC 0,67186

**D.**

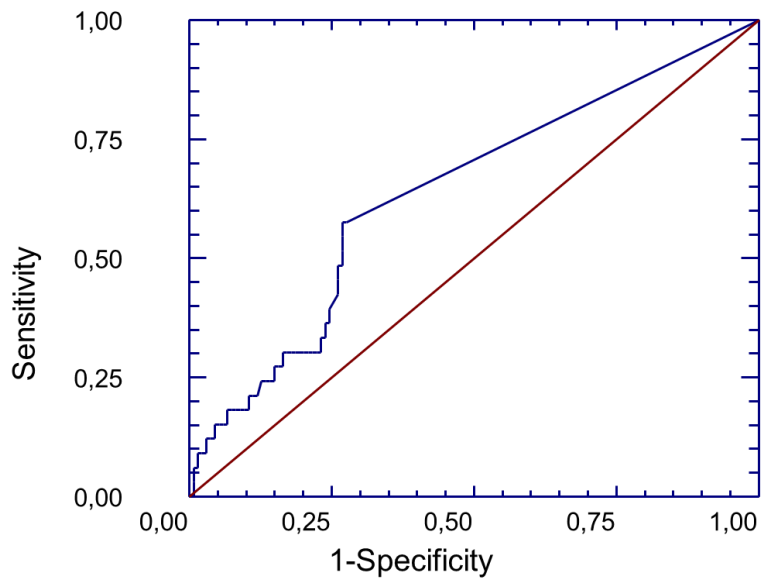

Empirical estimate of AUC 0,63806

Supplementary Figure 3.

A.

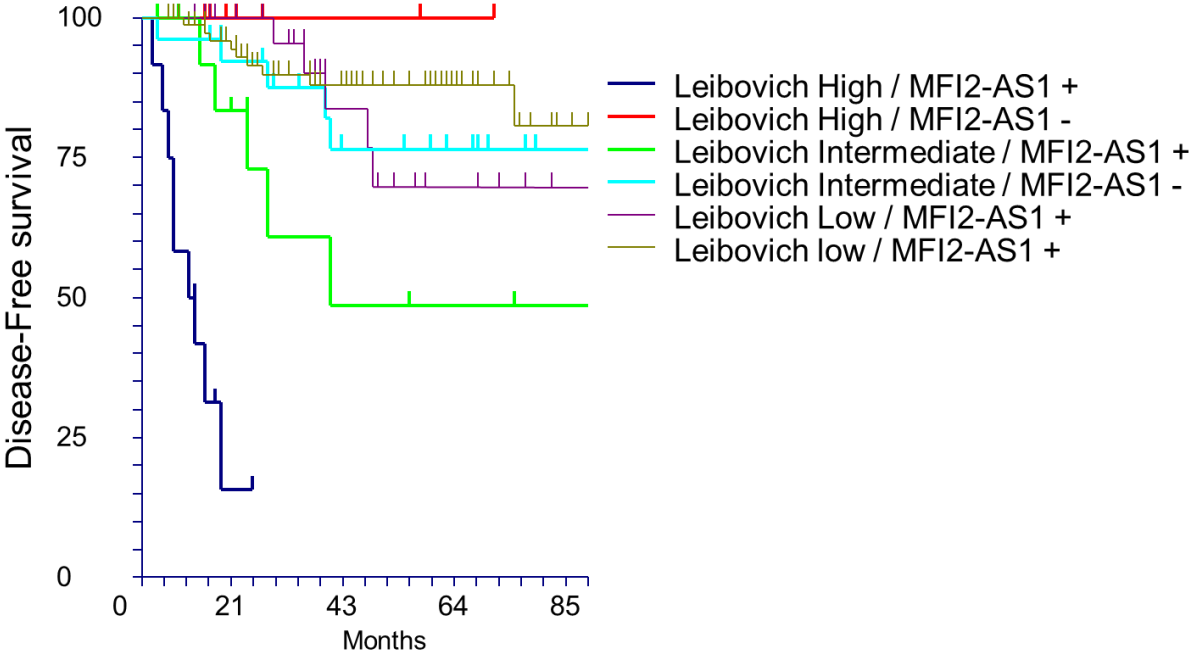

B.

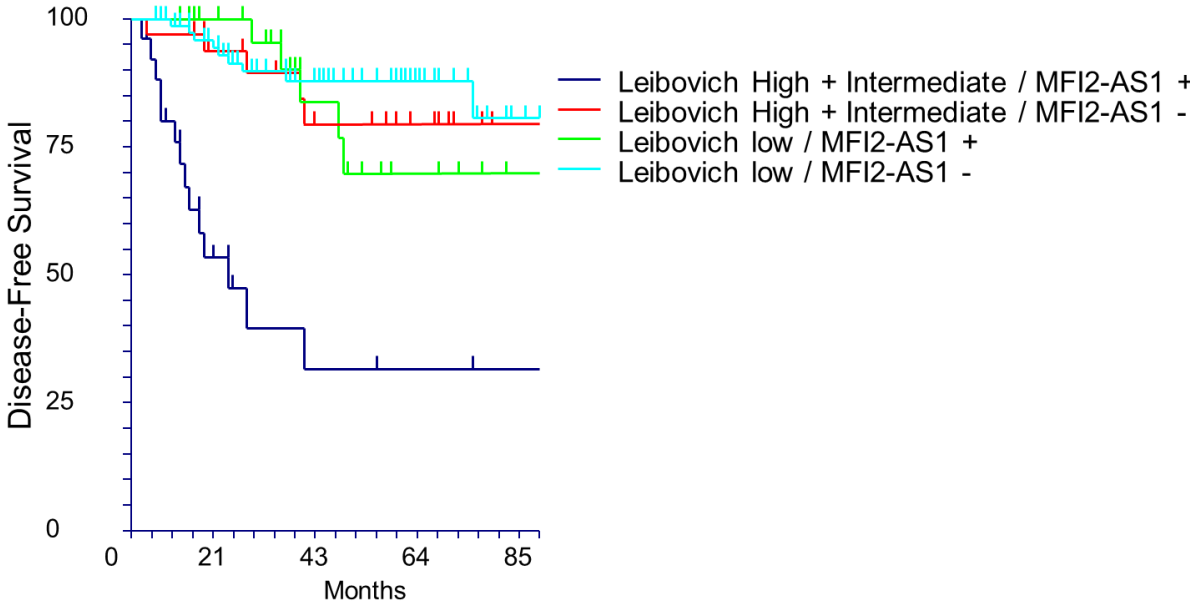

Supplement: 41598_2017_8363_MOESM1_ESM.pdf [file 41598_2017_8363_MOESM1_ESM.pdf]
